# Supplementary material
Source: PubMed Central journal article supplement (PMC1746772)
Supplement: thorax_58_8_674__1.pdf [file thorax_58_8_674__1.pdf]

**Table 1b** Mean (SD) quality of life baseline characteristics

|                                                                  | Control (n=29) | Buteyko (n=30) | Pink City (n=30) |
|------------------------------------------------------------------|----------------|----------------|------------------|
| SF-36 questionnaire dimension scores (possible range 0–100)      |                |                |                  |
| Physical function                                                | 81 (16)        | 83 (14)        | 71 (25)          |
| Role limitation due to physical problems                         | 74 (35)        | 69 (38)        | 75 (37)          |
| Role limitation due to emotional problems                        | 72 (40)        | 79 (32)        | 74 (37)          |
| Social functioning                                               | 84 (18)        | 86 (19)        | 79 (23)          |
| Mental health                                                    | 71 (19)        | 75 (15)        | 74 (17)          |
| Energy/vitality                                                  | 55 (20)        | 58 (19)        | 54 (24)          |
| Pain                                                             | 82 (22)        | 80 (21)        | 67 (28)          |
| General Health Perception                                        | 61 (24)        | 60 (23)        | 60 (17)          |
| Asthma Quality of Life Questionnaire scores (possible range 1–7) |                |                |                  |
| Overall                                                          | 5.0 (0.8)      | 5.1 (1.0)      | 4.9 (0.8)        |
| Activity limitation                                              | 5.1 (0.9)      | 5.2 (1.0)      | 5.0 (1.0)        |
| Symptoms                                                         | 4.9 (0.9)      | 5.0 (1.0)      | 5.0 (0.8)        |
| Emotional function                                               | 5.0 (1.3)      | 5.1 (1.4)      | 4.9 (1.2)        |
| Exposure to environmental stimuli                                | 4.9 (1.0)      | 5.0 (1.3)      | 4.8 (1.2)        |
