# Supplementary material
Source: PubMed Central journal article supplement (PMC1746772)
Supplement: thorax_58_8_674__2.pdf [file thorax_58_8_674__2.pdf]

**Table 4** Change in quality of life scores

|                                                                         | After 13 weeks          |                         |                         |         | After 26 weeks          |                        |                         |         |
|-------------------------------------------------------------------------|-------------------------|-------------------------|-------------------------|---------|-------------------------|------------------------|-------------------------|---------|
|                                                                         | Control                 | Buteyko                 | Pink City               | p value | Control                 | Buteyko                | Pink City               | p value |
| <i>SF-36 questionnaire dimension scores (possible range 0–100)</i>      | (n=24)                  | (n=26)                  | (n=24)                  |         | (n=22)                  | (n=23)                 | (n=24)                  |         |
| Physical function                                                       | 0.0<br>(–8.8 to 10.0)   | 5.0<br>(0.0 to 5.0)     | 0.0<br>(–8.8 to 8.8)    | 0.2     | 0.0<br>(–10.0 to 5.0)   | 5.0<br>(0.0 to 5.0)    | 0.0<br>(–5.0 to 8.8)    | 0.4     |
| Role limitation due to physical problems                                | 0.0<br>(0.0 to 0.0)     | 12.5<br>(0.0 to 31.3)   | 0.0<br>(–50.0 to 0.0)   | 0.009   | 0.0<br>(–6.3 to 0.0)    | 25.0<br>(0.0 to 50.0)  | 0.0<br>(0.0 to 0.0)     | 0.004   |
| Role limitation due to emotional problems                               | 0.0<br>(0.0 to 0.0)     | 0.0<br>(0.0 to 33.3)    | 0.0<br>(–25.0 to 0.0)   | 0.09    | 0.0<br>(0.0 to 0.0)     | 0.0<br>(0.0 to 0.0)    | 0.0<br>(0.0 to 0.0)     | 0.8     |
| Social functioning                                                      | 0.0<br>(–8.3 to 0)      | 0.0<br>(–13.9 to 11.1)  | 0.0<br>(–11.1 to 19.4)  | 0.97    | 0.0<br>(–25.0 to 0.0)   | 0.0<br>(0.0 to 11.1)   | 0.0<br>(0.0 to 22.2)    | 0.04    |
| Mental health                                                           | 2.0<br>(–4.0 to 7.0)    | 2.0<br>(–6.0 to 8.0)    | 0.0<br>(–7.0 to 8.0)    | 0.75    | 2.0<br>(–8.0 to 8.0)    | 0.0<br>(–8.0 to 12.0)  | 0.0<br>(–11.0 to 8.0)   | 0.6     |
| Energy/vitality                                                         | 0.0<br>(–5.0 to 5.0)    | –2.5<br>(–15.0 to 10.0) | –2.5<br>(–13.8 to 15.0) | 0.9     | 0.0<br>(–10.0 to 10.0)  | 0.0<br>(–10.0 to 20.0) | 0.0<br>(–8.75 to 10.0)  | 0.8     |
| Pain                                                                    | 0.0<br>(–22.2 to 11.1)  | 0.0<br>(–11.1 to 11.1)  | 0.0<br>(–27.8 to 22.2)  | 0.7     | 0.0<br>(–11.1 to 11.1)  | 0.0<br>(–11.1 to 11.1) | 0.0<br>(–8.3 to 19.4)   | 0.7     |
| General health perception                                               | –1.0<br>(–5.0 to 4.3)   | 1.5<br>(–5.0 to 15.0)   | 2.5<br>(–6.5 to 10.0)   | 0.45    | 0.0<br>(–5.5 to 5.8)    | 5.0<br>(–12.0 to 30.0) | 0.0<br>(–10.0 to 15.3)  | 0.8     |
| Change in health                                                        | 0.0<br>(0.0 to 25.0)    | 25.0<br>(0.0 to 50.0)   | 0.0<br>(0.0 to 25.0)    | 0.2     | 0.0<br>(0.0 to 25.0)    | 25.0<br>(0.0 to 50.0)  | 0.0<br>(0.0 to 25.0)    | 0.06    |
| <i>Asthma Quality of Life questionnaire scores (possible range 1–7)</i> | (n=24)                  | (n=26)                  | (n=25)                  |         | (n=22)                  | (n=23)                 | (n=24)                  |         |
| Overall                                                                 | 0.33<br>(–0.20 to 0.75) | 0.45<br>(0.11 to 1.47)  | 0.45<br>(–0.13 to 1.11) | 0.4     | 0.61<br>(–0.11 to 0.95) | 1.03<br>(0.19 to 1.69) | 0.57<br>(0.07 to 1.10)  | 0.2     |
| Activity limitation                                                     | 0.48<br>(–0.14 to 1.03) | 0.58<br>(0.19 to 1.31)  | 0.23<br>(–0.32 to 1.21) | 0.5     | 0.50<br>(0.09 to 1.14)  | 0.91<br>(0.18 to 1.36) | 0.50<br>(–0.32 to 1.00) | 0.4     |
| Symptoms                                                                | 0.33<br>(–0.31 to 0.58) | 0.42<br>(–0.17 to 1.60) | 0.5<br>(–0.38 to 1.21)  | 0.6     | 0.33<br>(–0.19 to 1.17) | 1.08<br>(0.08 to 1.92) | 0.58<br>(0.0 to 1.21)   | 0.2     |
| Emotional function                                                      | 0.30<br>(–0.20 to 0.60) | 0.80<br>(–0.10 to 1.80) | 0.60<br>(–0.10 to 1.40) | 0.2     | 0.40<br>(–0.35 to 1.00) | 1.00<br>(0.20 to 2.20) | 0.40<br>(0.0 to 1.30)   | 0.2     |
| Exposure to environmental stimuli                                       | 0.38<br>(–0.25 to 0.75) | 0.50<br>(0.0 to 1.50)   | 0.50<br>(0.0 to 1.38)   | 0.3     | 0.38<br>(–0.25 to 1.06) | 1.00<br>(0.0 to 1.75)  | 0.38<br>(0.0 to 1.75)   | 0.3     |

Values are median (interquartile range), Kruskal-Wallis test.

One subject in the control group failed to complete the SF-36 questionnaire at 3 months.
